# Supplementary material
Source: publisher site journal article supplement (https://www.dovepress.com/article/367834)
Supplement: Supplementary file 1 [file get_supplementary_file.php]

**Table of Contents for Supplementary Information**

Table S1: Medical Education articles (1998-2020) of WHOCCs, EMR with major findings, study design and Kirkpatrick’s model of evaluation

Table S2: Medical Education articles (1998-2020) classified based on domains and Kirkpatrick’s model of evaluation

Table S3: Medical Education articles (1998-2020) classified based on WHOCCs and Kirkpatrick’s model of evaluation

List of articles (1998-2020)

**Table S1: Medical Education articles (1998-2020) of WHOCCs, EMR with major findings, study design and Kirkpatrick’s model of evaluation**

| **S.No** | **Domain*** | **Title** | **Name of the WHOCC** | **Author** | **Major Finding(s)** | **Study design / Nature of intervention** | **Kirkpatrick level** |
| --- | --- | --- | --- | --- | --- | --- | --- |
| 1 | D1 | Integrating applied anatomy in surgical clerkship in a problem-based learning curriculum | CHPED, Bahrain | Abu-Hijleh, M. F.et al., 2005 (1) | The course bridged the gap between the pre-clerkship and clerkship phases, emphasizing the importance of extending the spiral pattern of the PBL curriculum to the clinical phase. | Questionnaire study seeking perceptions about the new course | Level 1 |
| 2 | D1 | The place of anatomy in medical education: Guide Supplement 41.1–Viewpoint | CHPED, Bahrain | Abu-Hijleh, M. F., 2010 (2) | The new methodology was found to be feasible, practical, and acceptable. | Review paper | NA** |
| 3 | D1 | The Curriculum at the College of Medicine and Medical Sciences at Arabian Gulf University: A Way Forward to Meet the Future Medical Education Needs | CHPED, Bahrain | Bindayna, K. M., & Deifalla, A. 2020 (3) | There is a continuous need for curriculum review to meet the changing needs of society in terms of demographics, disease epidemiology, and healthcare. It is essential to keep pace with advances in technology and newer techniques in medical education. | Descriptive analysis of the curriculum | NA** |
| 4 | D1 | Evidence-based medicine (EBM) for undergraduate medical students: A six-step, integrative approach | CRD, Egypt | Atwa, H. and Abdelaziz, A. 2017 (4) | Teaching EBM is recommended and applicable. It is not resource-intensive, and can be conducted through developing and integrating EBM courses in the undergraduate medical curriculum. Students and teachers agree upon the need and importance of teaching such discipline. | Integrated longitudinal course on Multisystem Module for Year 4 | Level 1 |
| 5 | D1 | Implementation and evaluation of a patient safety course in a problem-based learning program | CRD, Egypt | Eltony, S. A., et al. , 2017 (5) | The results of the pre- and post-test demonstrated a significant increase (P < 0.05) in the students' mean multiple choice question (MCQ) scores. Majority of students perceived the course positively (> 75%) | three-day course with pre and post - test design | Level 2 |
| 6 | D1 | Teaching and Assessment of Professionalism: A Comparative Study between Two Medical Schools | CRD, Egypt | Atwa, H., et al., 2016 (6) | There is a recognition of the necessity of addressing professionalism as an essential component of students’ education. | Comparative study based on two-stage survey | NA** |
| 7 | D1 | Frame Factors For Implementation Of Integrated Curriculum In Public Sector Medical College From Faculty's Perspective | CRHPE, Pakistan | Khan, A. A.,et al., 2016 (7) | Political will, strong leadership, faculty training, ownership of new curriculum, teamwork, incentives and communication emerged as facilitating factors whereas fear of the unknown, fixed mindset and faculty resistance were documented as potential impediments to curricular change . | Qualitative exploratory phenomenological design using constructivist approach | Level 1 |
| 8 | D1 | Faculty perception regarding integrated curriculum at undergraduate level: a qualitative study | CRHPE, Pakistan | Asad, M., & Khaliq, T., 2020 (8) | Faculty declared it as a positive experience and felt that integrated curriculum entailed improvement in diagnostic, cognitive and psychomotor skills of students. Faculty motivation to work as a team was considered as an essential factor for success of the integrated curriculum. | qualitative study on faculty perception | Level 1 |
| 9 | D1 | Integrated-modular system for undergraduate medical students: faculty’s perception | CRHPE, Pakistan | Waqar, T., & Khaliq, T. , 2019 (9) | The findings suggested that if integrated modular system (IMS) was implemented in true spirit, it was more effective than other teaching systems. IMS facilitated contextual and applied learning while enhancing the depths of knowledge. IMS developed learners’ critical thinking to analyze diverse and wide range of situations. | Constructivist approach using qualitative phenomenological design. | Level 1 |
| 10 | D1 | An outline of structured training program (STP) for FCPS in Psychiatry (Intermediate Module) | CRHPE, Pakistan | Rana, M. H., et al.,2008 (10) | A renewed emphasis on ethics and inculcation of professionalism are key features of the program. | Descriptive analysis of the program | NA** |
| 11 | D1 | An outline of structured training program (STP) for FCPS in Psychiatry (3rd and 4th year of training) | CRHPE, Pakistan | Rana, M. H., Farooq, S., & Afridi, M. I., 2010 (11) | The newly launched structured training program shows the college’s will and commitment to improve the training and assessment methods in the country and make them the envy of institutions in the West. | Descriptive analysis of structured training program (STP) | NA** |
| 12 | D1 | Development of the community-oriented medical education curriculum of Pakistan: A case report on the national initiative on curriculum development | CRHPE, Pakistan | Baig, L. A., Akram, D., & Ali, S. K., 2006 (12) | The developed COME curriculum incorporates major principles of COME and links theory with practice. The developed curriculum is expected to enhance students’ satisfaction and result in better quality of doctors. | A case report on the national initiative on curriculum development | NA** |
| 13 | D1 | Analyzing the curriculum of the faculty of medicine, University of Gezira (FMUG) using Harden’s 10 questions framework | EDC, Sudan | Ahmed, Y. A. and S. Alneel, 2017 (13) | SPICES strategy, wide range of assessment methods, non-threatening environment and a well-defined policy for curriculum management help FMUG students achieve the objectives of the curriculum. | Descriptive analysis based on Harden’s 10 Questions of curriculum development framework approach | NA** |
| 14 | D1 | Introducing the IMCI community component into the curriculum of the Faculty of Medicine, University of Gezira | EDC, Sudan | Abdelrahman SH, Alfadil SM, 2008 (14) | Significant improvement in Integrated Management of Childhood Illness (IMCI) key family practices in families visited by students compared with those families who were not visited. | Descriptive paper on introduction of IMCI community component into the curriculum his report presents the experience of FMUG in integrating such a training package into the medical curriculum. | NA** |
| 15 | D2 | Generalizability theory analyses of concept mapping assessment scores in a problem‐based medical curriculum | CHPED, Bahrain | Kassab, S. E., et al., 2016a, (15) | Assessment using concept mapping was highly reliable, but dependability needed recruitment of more raters. The dependability coefficient was 0.814. It was recommended to use three raters who each score two concept map domains, or by use five raters who each score only one concept map domain to achieve dependability level of 0.80. | Analysis of psychometric properties of concept maps | NA** |
| 16 | D2 | Do medical students’ scores using different assessment instruments predict their scores in clinical reasoning using a computer-based simulation | CHPED, Bahrain | Fida, M. and S. E. Kassab, 2015 (16) | Regression analysis indicated that OSCE scores predicted 32.7% and 35.1% of the variance in clinical reasoning and patient management scores, respectively (P<0.01). However, real patient encounter assessment does not appear to test a construct similar to what is tested in Computer-based case simulations (CCS) . | Analysis of psychometric properties of CCS software | NA** |
| 17 | D2 | Item analysis of multiple-choice questions (MCQs) at the Department of Paediatrics, Arabian Gulf University, Manama, Bahrain | CHPED, Bahrain | Kheyami, D., et al., 2018 (17) | Of the items, 48.4%, 35.3%, 11.4%, 3.9% and 1.1% had zero, one, two, three and four nonfunctional distractors (NFDs), respectively. Using three or four rather than five options in each MCQ resulted in 95% or 83.6% of items having zero NFDs. Some items needed to be discarded or revised. Using three or four rather than five options in MCQs is recommended to reduce the number of NFDs and improve the overall quality of the examination. | Analysis of psychometric properties of MCQs | NA** |
| 18 | D2 | Step-by-step Guide to Create Competency-Based Assignments as an Alternative for Traditional Summative Assessment. | CHPED, Bahrain | Amin, H., Shehata, M., Ahmed, S., 2020 (18) | Integrated competency-based e-assignments can be well-tailored to enthusiastic projects to provide fair assessments and to create usable products. Engaging student in the needs assessment, designing, planning, implementation, and evaluation of e-assignments are shown to maximize the outputs to unexpected horizons. | Descriptive paper with a case study | NA** |
| 19 | D2 | Development, implementation, and evaluation of an integrated multidisciplinary Objective Structured Clinical Examination (OSCE) in primary health care settings within limited resources | CRD, Egypt | Abdelaziz, A., et al., 2016 (19) | Development of validated integrated multi-disciplinary and low cost OSCE stations with an estimated reliability index of 0.6. , A critical mass of faculty members were trained on blueprinting and station writing and a group of trained assessors, facilitators and role players. A state of awareness among students on how to proceed in multidisciplinary OSCE was achieved | Development, implementation and evaluation of multidisciplinary OSCE | Level 2 |
| 20 | D2 | Mini-CEX a reliable and doable workplace-based assessment tool | CRHPE, Pakistan | Baqai, S., 2018 (20) | A trend of increased performance was observed amongst the trainees with each subsequent evaluation, in clinical skills over the period of 12 months. This finding supported the construct validity of the instrument, and showed that the mini-CEX could be a potentially powerful tool to provide high-quality, interactive feedback that could contribute to improvement in trainees’ clinical skills . | Quasi-experimental, co relational study | Level 2 |
| 21 | D2 | Peer assisted versus expert assisted learning: a comparison of effectiveness in terms of academic scores | CRHPE, Pakistan | Manzoor, I., 2014 (21) | 46.3% students said that Peer Assisted Learning (PAL) was an effective technique. 70.4% students found it easy to communicate with a peer. PAL showed equivalent efficacy in terms of students score in MCQs test as expert assisted learning. 44.4% students agreed to add PAL in curriculum of community medicine. | Cross over randomized control trial followed by a cross sectional survey | Level 2 |
| 22 | D2 | Students’ perception of direct observation of procedural skills (DOPS) as workplace based assessment tool in general surgery | CRHPE, Pakistan | Waqar, S. H., 2016 (22) | Majority of trainees agreed that DOPS was beneficial and helped in improving their surgical skills. Major concerns were time constraints and lack of DOPS training. Feedback with advice on further improvement was not always given. DOPS was perceived as useful assessment tool in general surgery but training was essential in its planning and implementation. | Sequential mixed method study. | Level 1 |
| 23 | D2 | Correlation of MCQ and SEQ scores in written undergraduate ophthalmology assessment | CRHPE, Pakistan | Mahmood, H., 2015 (23) | Moderate correlation was seen between MCQ and SEQ scores (r=0.5, p < 0.01). Split-half reliability of MCQs had moderate correlation (r=0.4, p < 0.01) while inter-rater reliability of SEQs scores showed high correlation (r=0.9, p < 0.01). None of the MCQ and SEQ attained problem solving level. Using variety of tools for assessment were shown to improve both the validity and reliability enabling examiners to draw fair conclusions about a student's ability. | Correlational analytical study. | NA** |
| 24 | D2 | Case based learning (CBL) and traditional teaching strategies: Where lies the future? | CRHPE, Pakistan | Bano, N., Arshad, F., Khan, S., & Safdar, C. A., 2015 (24) | There was no statistically significant difference in performance assessment. However, strong preference for CBL was expressed by 97% as it improved their confidence (83%), clinical and presentation skills (91& 80%), attitude and student teacher relationship (68 & 77%), strengthened link between theory and practice (90%), and integrated basic and clinical knowledge (92%). | Sequential mixed method study | Level 1 |
| 25 | D2 | Mini-CEX: feasibility, acceptability and effectiveness of its use in the learning of post graduate residents | CRHPE, Pakistan | Sultana, S., 2018 (25) | Almost all the residents (18/21) and faculty members (8/10) were satisfied with the mini-CEX as a learning tool. More than 75% of the residents showed gradual and statistically significant improvement in scores from the first to the fourth semester. Majority of comments indicated that feedback was the strongest characteristic of mini-CEX. About 27% residents felt anxious being observed. Mini-CEX was shown as highly acceptable and feasible educational tool. | Mixed method approach | Level 2 |
| 26 | D2 | Feedforward interview (FFI) technique in obstetrics and gynaecology residents: A fact or fallacy | CRHPE, Pakistan | Sami, S., & Ahmad, A., 2015 (26) | FFI technique enabled majority of residents in recalling minimum of 3 positive experiences, which enhanced their motivation to aspire for further improvement in this area. Hard work was the main personal contributing factor both in FFI and survey. Residents also reported need for more academic support as an important factor. | survey questionnaire and in-depth Feedforward Interviews (FFI) | Level 1 |
| 27 | D2 | E-Log system in monitoring of residency program: Trainees’ perspective | CRHPE, Pakistan | Khan MA, et al., 2015 (27) | A total of 4399 responses were received. The mean score for motivation was 4.61 ± 1.98, ‘ease of use’ was 4.56 ± 2.15 and ‘acknowledgment of control of one's training by the new system’ was 4.33 ± 2.00. The overall acceptance of the students regarding E-Log system was high. Students recommended IT workshops at the start of training to enhance the utility of E-Log system. | survey questionnaire and in-depth interviews | Level 1 |
| 28 | D2 | Student assessment in community settings: a comprehensive approach | EDC, Sudan | Magzoub, M. E. M., etval., 1998 (28) | The comprehensive approach employed by the FMUG in assessing students in community settings (composed of peer-evaluation, community leaders’ feedback, supervisory checklist, individual and group report, short essay questions, and multiple-choice questions) was successful. The reliability coefficient was found to range between 0·77 and 0·92. | adaptation of a comprehensive approach to student assessment in community settings | NA** |
| 29 | D2 | Multiple Choice Questions (MCQ) Revisited: Improvement of Validity for Fair Tests | EDC, Sudan | Abdalla, M. E., 2013 (29) | The major threats of validity of MCQs were found to be construct under representation (CU) and the construct irrelevant (CIV) . Faculty development programs, test blueprinting, and adoption of guidelines for item construction were recommended for development of valid and reliable tests. | Descriptive paper | NA** |
| 30 | D3 | Does a socially accountable curriculum transform health professional students into competent, work-ready graduates? A cross-sectional study of three medical schools across three countries | EDC, Sudan | Woolley, T., et al., 2019 (30) | Socially accountable health professional education (SAHPE) produces a local medical workforce that is at least as ‘work ready’ as graduates from more traditional medical schools in terms of overall performance and biomedical knowledge and skills, but rated much higher in socially-accountable competencies such as communication skills, working as a team, professionalism, commitment to health equity, and working with under-served populations. | self-administered survey | Level 1 |
| 31 | D3 | “Mentorship” a stride towards maintenance of medical student’s well being | CRHPE, Pakistan | Rehman, R., Usmani, A., Omaeer, Q., & Gul, H., 2014 (31) | Emotional support provided by mentoring program of Bahria University Medical and Dental College (BUMDC) minimized the stress among parents and students of first year medical education. Reduced consultation with psychologists or psychiatrists was also documented. | cross-sectional questionnaire-based survey | Level 1 |
| 32 | D3 | Students perception towards feedback in clinical sciences in an outcome-based integrated curriculum | CRHPE, Pakistan | Ansari T, Usmani A., 2018 (32) | Senior students gave more value to feedback opined that feedback provided useful suggestions for future improvement. The results highlighted the need for more structured feedback mechanism, and there was s a need for faculty engagement to create an effective educational alliance. | questionnaire study on student’s perception of useful feedback | Level 1 |
| 33 | D3 | Student's opinion regarding teaching methods: A survey amongst MBBS and BDS students of a private Medical University in Karachi | CRHPE, Pakistan | Reza, Z., et al., 2018 (33) | Around 120 (30%) of the participants supported Problem Based Learning (PBL) as the most effective teaching method while 64(16%) considered clinical rotations, and 60(15%) voted for lectures. Integrated method of teaching was endorsed by both MBBS and BDS students. | questionnaire study on student’s perception of useful feedback | Level 1 |
| 34 | D3 | Communication skills training of undergraduates | CRHPE, Pakistan | Ali, A. A.,2013 (34) | The communication skills of the studied group were inadequate to address special situations. This finding showed the need for developing a communication skills training program. | Sequential mixed method design using survey questionnaire and in-depth interviews | Level 1 |
| 35 | D3 | Faculty Perceptions About Roles and Functions of a Department of Medical Education (DME) | CRHPE, Pakistan | Khalid, T., 2013 (35) | In faculty members’ opinion, functions of DME were faculty development (83%), interdepartmental collaboration (81%), research (77%), curriculum development (66%), career counselling (62%) and faculty evaluation (60%). Development of DME was considered a positive change by 119 (80%) respondents. | Mixed methods study (sequential exploratory design) on faculty's perception | Level 1 |
| 36 | D3 | Student perspective about One Minute Preceptorship (OMP) in a busy outpatient setting | CRHPE, Pakistan | Moin, M., Sadia, S., & Naqi, S. A., 2016 (36) | Qualitative analysis showed that OMP was a student friendly tool which provided instruction in a short period of time. OMP was perceived to improve presentation skills, clinical evaluation of the patient, making a plan of action and providing feedback. | Questionnaire study | Level 1 |
| 37 | D3 | The effects of teaching professionalism in a private medical college of Pakistan | CRHPE, Pakistan | Khan, M. N. A., 2018 (37) | A robust curriculum with explicit teaching of professionalism brought about a significant improvement in students’ attitudes pertaining to professionalism. The students recognized role modelling to be the most effective method and perceived that formal mentoring, faculty development and proper assessment plan can improve the training in professionalism. | Two phase explanatory-sequential mixed method study | Level 1 |
| 38 | D3 | Students’ perception of the learning environment and its relation to their study year and performance in Sudan | EDC, Sudan | Ahmed, Y., et al., 2018 (38) | High achievers’ perceptions of the learning environment were significantly better than those of low achievers. A large-scale study is required to analyze the weaknesses and the strengths of each academic level. | Questionnaire study on perception | Level 1 |
| 39 | D3 | Impact of Structured Meetings on the Learning of Faculty Members | CRHPE, Pakistan | Usmani A, Rehman R, Babar S, Afzal A., 2012 (39) | This intervention was shown to enhance faculty's knowledge, presentation skills, confidence level, positive attitudes and educational leadership qualities among faculty. | cross sectional study with self reported questionnaire | Level 1 |
| 40 | D3 | Students’ Views Of Mentoring At Bahria University Medical College | CRHPE, Pakistan | Usmani, A., & Omaeer, Q., 2016 (40) | Majority of students of BUMDC expressed that they were able to carry on with their academic and non-academic routine due to the presence of mentoring. They also agreed that it was due to the presence of mentors, that they were able to continue with their difficult studies in difficult times. | questionnaire study on the level of satisfaction | Level 1 |
| 41 | D3 | Effectiveness of interactive lectures on knowledge retention and students motivation in undergraduate medical education - a mixed method study | CRHPE, Pakistan | Khalid, K., & Ahmad, S. A., 2019 (41) | Interactive lectures were shown to foster deep learning and critical thinking abilities among undergraduate medical students. Strategic use of interaction and assessments improved the academic performance and motivated students for self-regulated learning. | Interactive lectures with Pre- and Post-test assessment | Level 2 |
| 42 | D3 | Team Based Learning (TBL) in Undergraduate Medical Education | CRHPE, Pakistan | Hashmi, N. R., 2014 (42) | The 72 students included in the study achieved higher mean test scores on test questions that assessed their knowledge of Diabetes mellitus content learned using the TBL strategy compared with traditional didactic lectures (TDL) (p < 0.001). TBL learning method was favored by a majority of medical students compared TDL. | A comparative study | Level 2 |
| 43 | D3 | Impact of Case Based Discussion “CBD” as an instructional tool on the annual examination results in ophthalmology for 4th year undergraduate medical students | CRHPE, Pakistan | Nasir, J., Ashar, A., Ahmad, A., & Khanum, A., 2018 (43) | There was statistically insignificant difference (p-value 0.087) between scores obtained by historical controls and those who received intervention (CBD). There was insignificant negative correlation in (-0.028) between scores obtained through traditional assessment and CBD. CBD shown to foster higher order thinking among undergraduate students in Ophthalmology. | Quasi experimental study | Level 2 |
| 44 | D3 | The role of medical students in patient education to promote home management of diabetes mellitus in wad Medani town, Sudan 2003 | EDC, Sudan | Ahmed, M. E. and S. H. Abdelrhan, 2006 (44) | Student-led patient education regarding diabetes mellitus resulted in improvement of general knowledge and skills of diabetics and their families leading to a tangible improvement of home management of diabetes mellitus in Wad Madani. | Longitudinal interventional study conducted in which students were trained to educate diabetics and their families on the home management of diabetes. | Level 3 |
| 45 | D3 | Role of Suez Canal University, Faculty of Medicine (FOM-SCU) in Egyptian Medical Education Reform | CRD, Egypt | Hosny, S., et al., 2016 (45) | Salient reforms of FOM-SCU included: Establishment of a WHO collaborating center in the field of medical education and research. Having the first department for medical education in Egypt and the region. Obtaining the national academic accreditation in 2010 and reaccreditation in 2015. Offering training and consultations to numerous medical schools in other countries, including Syria, Libya, Yemen, Sudan, Somalia, and Ethiopia | Descriptive study | NA** |
| 46 | D3 | Is our medical school socially accountable? The case of Faculty of Medicine, Suez Canal University | CRD, Egypt | Hosny, S., et al., 2015 (46) | FOM-SCU shows general compliance to the domains of social accountability, especially in the domain of conceptualization, production, and usability. | Curriculum review | NA** |
| 47 | D3 | Assessment of the social accountability of the faculty of medicine at University of Gezira (FOM-UG), Sudan. | EDC, Sudan | Elsanousi, S., Elsanousi, M., Khalafallah, O., & Habour, A., 2016 (47) | The documents were reviewed based on WHO social accountability grid and the conceptualization–production–usability model as frameworks for analysis. In most of the domains FOM-UG was found to be demonstrating an impact on the community health-system of local area, and is on the way to becoming fully socially accountable in certain aspects. | Descriptive study | NA** |
| 48 | D3 | The Initiative of the University of Gezira for Safe Motherhood and Childhood-Gezira State Sudan 2005-2011 | EDC, Sudan | Hussien, I. H., et al., 2011 (48) | Students were involved in the application of comprehensive school health programs, safe motherhood, and prevention of blindness initiatives. This initiative manifested in reduction of maternal mortality rate and newborn mortality rate in Gezira state. | Descriptive study | NA** |
| 49 | D3 | Impact of selection strategies on representation of underserved populations and intention to practise: international findings. | EDC, Sudan | Larkins, S., et al., 2015 (49) | New strategies may contribute to a diverse medical student body with strong intentions to work with underserved populations. | cross-sectional comparative study based on a questionnaire | NA** |
| 50 | D3 | The Arabian Gulf University College of Medicine and Medical Sciences (CMMS,AGU): A successful model of a multinational medical school | CHPED, Bahrain | Hamdy, H. and M. B. Anderson, 2006 (50) | CMMS-AGU provides a model for a multinational approach to governance and support for a medical school where resources from six countries have been combined to create an academic medical Center in an area that previously lacked this resource. CMMS-AGU serves the community needs by involving the community in its programs. A major strength of CMMS-AGU is its multinational, multicultural students and faculty. | Descriptive study | NA** |
| 51 | D3 | A reform agenda outline for medical education in Pakistan | CRHPE, Pakistan | Shaikh, S. H., 2009 (51) | Higher Education Commission of Pakistan and Pakistan Medical and Dental Council (PMDC) identified competencies for all phases of medical and dental education and then developed competency-based curricula. College of Physicians and Surgeons Pakistan (CPSP) devised effective tools for monitoring the training for its fellowship and membership programs adhering with the PMDC. | Descriptive study | NA** |
| 52 | D4 | Medical students’ perceptions of peer assessment in a problem-based learning curriculum | CHPED, Bahrain | Tayem, Y. I., et al., 2015 (52) | Peer-assessment (PA) following the PBL sessions is well-accepted by the students and perceived to have a positive impact on intragroup attitudes. | Questionnaire study on students’ perceptions of PA | Level 1 |
| 53 | D4 | Impact of clinical simulation on the clinical competence of medical students’ clerkship training, Bahrain Med | CHPED, Bahrain | Hassan, A. B., et al., 2018 (53) | Better clinical skills performance was observed among students trained with a web-based simulated patient cases program named “Diagnostic Clinical Reasoning Program (DxR)” when compared to students who did not receive such training. | Prospective Pilot Study comparing the performance of students using DXR with their grades at the end of clerkship examination | Level 2 |
| 54 | D4 | Lecturing skills as predictors of tutoring skills in a problem-based medical curriculum | CHPED, Bahrain | Kassab, S. E., et al., 2016b (54) | Most important predictors of good tutoring skills in PBL were subject matter mastery, responding effectively to students’ questions, providing a relaxed class atmosphere and effective use of audio-visual aids. | prediction of tutoring skills using lecturing skills, analyzed statistically through stepwise linear regression | NA** |
| 55 | D4 | Challenges of teaching physiology in an integrated system-based curriculum | CHPED, Bahrain | Hasan, Z. and R. Sequeira, 2012 (55) | System-based approach to teaching and learning in medical education emphasizes the basic sciences concepts in a clinical context. Some of these challenges included defining the core curriculum, curriculum links, sequencing curriculum content, interdisciplinary integration, and student assessment. | Descriptive study | NA** |
| 56 | D4 | Development and validation of the motivation for tutoring questionnaire in problem-based learning programs | CHPED, Bahrain | Kassab, S. E., et al., 2017 (56) | An innovative tool named “Motivation for Tutoring Questionnaire in Problem-Based Learning (MTQ-PBL)” proved to be effective in evaluation of tutoring skills. The tool was tested, and it exhibited acceptable psychometric properties. | Validation of the MTQ-PBL using confirmatory factor analysis | NA** |
| 57 | D4 | Coaching as a Tool for Personal and Professional Development in a Problem-Based Learning (PBL) Medical Curriculum: A Qualitative Study | CRD, Egypt | Farghaly, A. and A. Abdelaziz, 2017 (57) | It was concluded that coaching was an applicable method for both postgraduate and undergraduate students, especially with innovative curricula rather than traditional curricula. | qualitative study on opinions of experts and leaders in a Problem-Based learning (PBL) | Level 1 |
| 58 | D4 | Correlation between Assessment of Concept Maps Construction and the Clinical Reasoning Ability of Final Year Medical Students at the Faculty of Medicine, Suez Canal University, Egypt | CRD, Egypt | Radwan, A., et al., 2018 (58) | Significant correlation was observed between students’ ability to construct concept maps and their clinical reasoning skills. They also recommended the use of concept maps as a tool for assessing reasoning skills in HPE. | Analytical cross-sectional study | Level 2 |
| 59 | D4 | Assessment of Medical Students’ Readiness for Self-directed Learning (SDL) | CRD, Egypt | Atwa, H. S., 2018 (59) | Satisfactory degree of readiness for SDL was positively related to their academic achievement (as indicated by their grade point averages).Females had significantly more readiness for SDL than males. | Descriptive cross-sectional study | NA** |
| 60 | D4 | Evaluation of strategies to increase students’ involvement for improving interactive lectures in chemical pathology | CRHPE, Pakistan | Ijaz, A., 2014 (60) | Efforts to improve interactive lectures were positively perceived by the learners. | Case study with pragmatic research paradigm. Questionnaire and focus group discussion (FGDs) | Level 1 |
| 61 | D4 | Changes in the level of the students’ motivations in the first six month of dental education & the factors affecting motivation at dental colleges | CRHPE, Pakistan | Zubair, S., Khan, M. A., & Ayub, T., 2019 (61) | Quality of Teachers, Teaching Methodology and Content were rated as most important factors by students, turned out to be core reasons for their decline in motivation as per this study | Pre-post comparative design using motivation questionnaires | Level 1 |
| 62 | D4 | Comparison of stress levels among medical and dental students in the clinical years of training and their coping strategies | CRHPE, Pakistan | Abbasi, S., et al., 2020 (62) | Dental students had slightly higher stress level than medical students. The most common stress management strategy was meditation/praying | cross-sectional comparative study using 'Cohen Perceived Stress Scale' questionnaire | Level 1 |
| 63 | D4 | Comparison of students and facilitators' perception of implementing problem-based learning | CRHPE, Pakistan | Usmani, A., et al., 2011 (63) | For implementing this strategy there was support from the academic administration, principal and faculty responsible for implementation of the PBL-based curriculum). Junior faculty members (instructors) gave encouraging results. Students were supportive of this strategy , however senior faculty was not very enthusiastic about implementation of this strategy | A questionnaire-based survey | Level 1 |
| 64 | D4 | Students' opinion regarding application of Epidemiology, Biostatistics and Survey Methodology Courses in medical research | CRHPE, Pakistan | Ahmad, F., Zehra, N., Omair, A., & Anjum, Q., 2009 (64) | Research methods courses conducted in the first two years of MBBS were considered relevant and useful by the medical students. The application of these courses should be encouraged by involving the students in research projects during their undergraduate years | A cross-sectional questionnaire study to assess the students' opinion | Level 1 |
| 65 | D4 | Problems of group dynamics in problem based learning (PBL) sessions | CRHPE, Pakistan | Ahmed, Z., 2014 (65) | Students ranked “Dominant student” as the most important problem and “Psychosocial factors” as the least important problem. Tutors ranked “Quiet student” as the most important problem and “Personality clash” as the least important factor. There was good agreement between the students and the tutors on all the factors regarding important problem except “Lateness, absenteeism” (p=0.04) and “Personality clash” (p=0.001). | cross sectional study using a perception questionnaire. | Level 1 |
| 66 | D4 | Undergraduate students’ perception about current lecturing practices | CRHPE, Pakistan | Khan, B., 2014 (66) | Attributes desired in a good lecturer as described by students were focus on the subject, grasp on the language, pleasant personality, adequate energy level and variation accordingly and able to maintain discipline in the class. Review of previous lecture and prior intimation of lecture topics to students were suggested. | A sequential mixed method using questionnaire and FGD | Level 1 |
| 67 | D4 | Problem based learning (PBL) and its implementation: faculty and student’s perception | CRHPE, Pakistan | Aziz, A., Iqbal, S., & Zaman, A. U., 2014 (67) | Faculty (56%) and students (43.8%) perceived that PBL was time-consuming as compared to conventional method. 80 % faculty and 73.2% students support introducing PBL at Lahore Medical and Dental College (LMDC), after providing faculty training. Both faculty (76%) and students (71.9%) agreed that PBL help in producing better results in examination. | Mixed method sequential design using survey and in depth interviews | Level 1 |
| 68 | D4 | Analysis of learning and teaching strategies in Surgery Module: A mixed methods study | CRHPE, Pakistan | Imran, M., 2019 (68) | There were positive correlations between learning strategies, cognitive and metacognitive and resource management, with final grades of students (p<0.001). Items of the questionnaire showed positive correlation with each other. Some of the major themes were elaboration, organization, critical thinking, self-regulatory learning, group and peer learning, and focus of learning. High achievers were found to be using learning strategies effectively. | mixed-methods research with convergent parallel design. Questionnaire study with FGD and interviews. | Level 1 |
| 69 | D4 | Learning through small group discussion (SGD) versus didactic lectures | CRHPE, Pakistan | Qamar, M. R., Ahmad, A., & Niaz, K., 2015 (69) | students found lecturing was a better way of learning than SGD in terms of content coverage (62.5%) and senior people teaching (37.5%), Whereas, the downside of SGD was related to the fact that the junior teachers were involved in teaching SGD (62.5%) who were less prepared (45.8%) and lack of uniformity in practicing the intervention in different wards (41.7%). | Sequential mixed methods design | Level 2 |
| 70 | D4 | Fostering deep learning approach with small group discussion (SGD) | CRHPE, Pakistan | Ali, Q. M., Raza, S. H., & Masroor, S., 2018 (70) | There was generalized increase in knowledge of all participants due to the intervention, in terms of post-test scores (p-value was <0.001), establishing the effectiveness of the intervention. SGD was perceived as one of the best academic strategy by all participants. | Quasi experimental design, single arm study (quantitative method), using pre-test and post-test scores. | Level 2 |
| 71 | D4 | Perception of “stress” & “stressors” among first year medical students and effect of intervention on their stress perception | CRHPE, Pakistan | Aisha, D., 2020 (71) | Most common stressors identified were, time management (24.1%), lack of guidance from teacher regarding test/exam preparation (20.8%), failure to memorize and retain learned facts (19.1%). The difference of Perceived Stress Scale (PSS) scores before (baseline) and after intervention (delayed) was statistically significant (p-value <0.001) between two groups. | Quasi-experimental study. | Level 2 |
| 72 | D4 | Use of simulated patients for assessment of communication skills in undergraduate medical education in obstetrics and gynaecology | CRHPE, Pakistan | Jabeen, D., 2013 (72) | Undergraduate students were more in favour of using simulated patients encounters for evaluation of communication skills. There were no significant difference between students’ performance on real and simulated patients. | Mixed method (combined qualitative and quantitative). | Level 2 |
| 73 | D4 | Effectiveness of problem based learning (PBL) as an instructional tool for acquisition of content knowledge and promotion of critical thinking among medical students | CRHPE, Pakistan | Tayyeb, R., 2013 (73) | Teaching through traditional method significantly improved content knowledge, (p = 0.001) but did not considerably improve clinical reasoning and problem solving skills (p = 0.093) whereas, content knowledge of students who studied through PBL remained the same (p = 0.202) but there was marked improvement in their clinical reasoning and problem solving skills (p = < 0.001). | Quasi-experimental study using pre-test and post-test design | Level 2 |
| 74 | D4 | Complementing theory with practice to enhance students’ learning | CRHPE, Pakistan | Suliman, M. I., Imran, F., Shafiq, A., & Qayum, I., 2016 (74) | Student performance in OSCE significantly increased from pre- to post-test (p<0.001) in both the groups; on the other hand no statistically significant difference was found in the pre- and posttest scores between groups A and B (p=0.108). Students' ability to grasp the procedural skills was not significantly different when they acquire the cognitive skills in addition to the practical sessions. | Sequential mixed method study design with pre-test and post-test followed by FGD | Level 2 |
| 75 | D4 | Assessment of collaborative problem solving (CPS) skills in Undergraduate Medical Students at Ziauddin College of Medicine, Karachi | CRHPE, Pakistan | Mughal, A. M., & Shaikh, S. H., 2018 (75) | PBL has been shown to facilitate development of CPS skills’ progression, however in this curriculum, PBL’s main focus on social skills development might have less emphasis on cognitive skill development. Thus, hybrid instructional strategies with components from Team Based Learning (TBL) and mentorship are recommended for better development of CPS skills. | analytical comparative cross-sectional study | NA** |
| 76 | D4 | Learning style of medical students and its correlation with preferred teaching methodologies and academic achievement | CRHPE, Pakistan | Bhalli, M. A., Khan, I. A., & Sattar, A., 2016 (76) | Most of the medical students had reflector (46.8%) and pragmatist (27.3%) learning styles. Majority preferred interactive lectures (28.57%) and PBL (25.98%) as teaching methodologies. Aligning instructional strategies with learning styles of the medical students might improve learning and academic performance. | Correlational study | NA** |
| 77 | D5 | Effective use of real-life events as tools for teaching-learning clinical pharmacology in a problem-based learning curriculum | CHPED, Bahrain | James, H., et al., 2015 (77) | PBL problems were proven more effective and engaging when based on real life stories. | An interventional study | Level 1 |
| 78 | D5 | Medical students perceptions of supporting pharmacology learning in English by key information prepared in Arabic | CHPED, Bahrain | Tim, Y., et al., 2017 (78) | Supporting pharmacology learning in a foreign language with instructional materials prepared in a native language improved students self-reported learning and satisfaction and made learning more meaningful. | A descriptive study | Level 1 |
| 79 | D5 | Online Team‐Based Learning (TBL) Sessions as Interactive Methodologies During the Pandemic | CHPED, Bahrain | Gaber, D. A., Shehata, M. H., Amin, H. A., 2020 (79) | Successful and innovative online conduction of TBL sessions using Zoom video communication platform. With adequate support, this model can be replicated in other teaching and learning modalities. | Implementation of TBL & evaluating students' perception. | Level 1 |
| 80 | D5 | Design of e-Learning (EL) Using Problem-Based Learning (PBL) Strategy: its Effectiveness on Medical Students’ Achievement and Attitude towards the Learning Method | CHPED, Bahrain | Nouby, A. M. and A. H. Salem, 2016 (80) | The use of EL had a positive effect on the academic achievement of students and their attitude towards PBL. | An interventional study comparing two groups | Level 2 |
| 81 | D5 | Competence of medical students in communicating drug therapy: Value of role-play demonstrations | CHPED, Bahrain | Tayem, Y. I., et al., 2016 (81) | Role‑play demonstrations were well accepted by medical students and led to the development of their competence in communicating drug therapy to patients. | An interventional study comparing two groups | Level 2 |
| 82 | D5 | Student-led tutorials in problem-based learning: educational outcomes and students' perceptions | CHPED, Bahrain | Kassab, S., et al., 2005 (82) | The impact of peer-tutoring in student-led tutorials (SLT) on group dynamics and student achievement in examinations were positive. Student tutors required special training before adopting this approach in PBL programs. | A comparative study of students' perception and performance | Level 2 |
| 83 | D5 | A new opportunity for Egyptian health professions educators | CRD, Egypt | Talaat, W. and H. Salem, 2009 (83) | A postgraduate higher diploma in health professions education (HPE) is developed for Egyptian health professions educators aiming at helping them carry out their educational role for which they are assigned in their schools, with the end result of making a real impact on HPE in Egypt. | Perception study | Level 1 |
| 84 | D5 | Teaching evidence-based medicine (EBM) using a problem-oriented approach | CRD, Egypt | Hosny, S. and M. S. Ghaly, 2014 (84) | Integrating EBM into Problem Based Learning (PBL) sessions were more stimulating than traditional PBL sessions and helped the students to practice and implement EBM in clinical context. Students and faculty were satisfied by integrating EBM into PBL sessions. | Implementation and evaluation of a training course on EBM using PBL. | Level 1 |
| 85 | D5 | Revitalising student motivation in problem‐based learning (PBL) with computer enhancement (CE) | CRD, Egypt | El‐Wazir, Y., Hosny, S., & Farouk, O., 2011 (85) | CE helped the students to understand better, learn more deeply, remember materials for a longer time, and participate more in discussions. CE made PBL sessions more interesting, improved the students’ abilities in problem solving, and improved performance in written examinations compared to the classic version of PBL. | Perceptions on digital transformation of the educational problems | Level 1 |
| 86 | D5 | Integrating interprofessional education (IPE) in community-based learning activities: case study | CRD, Egypt | Hosny, S., et al., 2013 (86) | -       The overall outcome of IPE in the community-based learning settings was satisfactory to the students and believed that it produced physicians who were familiar with the roles of other professions. More comprehensive IPE modules are recommended. | perceptions on community-based learning activities. | Level 1 |
| 87 | D5 | Introducing computer-assisted training (CAT) sessions in the clinical skills lab at the Faculty of Medicine, Suez Canal University | CRD, Egypt | Hosny, S., et al., 2008 (87) | The CAT sessions were satisfactory for both faculty and students. The use of CAT materials was associated with lower failure rates among students when compared to the previous three years. | An interventional study comparing different groups | Level 2 |
| 88 | D5 | Evaluation of an Interprofessional Course (IPC) on Leadership and Management for Medical and Nursing Pre-registration House Officers | CRD, Egypt | El Bakry, A. A. N., et al., 2018 (88) | Statistically significant improvement was observed in the participants’ readiness for IPC, knowledge and application of leadership and management skills, as well as their collaborative behavior at the workplace. | An interventional study | Level 2 |
| 89 | D5 | Peer Assisted Learning (PAL) as a Formal Instructional Tool | CRHPE, Pakistan | Naqi, S. A., 2014 (89) | PAL can offer learning opportunity to medical students, residents and faculty members. It can improve depth of their knowledge and skills. | perceptions on PAL | Level 1 |
| 90 | D5 | Whatsapp an informal learning and communication tool: perception of medical officers working in low resource setting | CRHPE, Pakistan | Khan, A., Usmani, A., & Khaliq, T., 2020 (90) | WhatsApp was perceived as an effective tool for good communication as well as for improving clinical knowledge among medical officers working in low-resource setting. | Mixed-method study on perception on WhatsApp as an informal educational tool. | Level 1 |
| 91 | D5 | Do near-peers learn better by teaching junior colleagues? A qualitative study to assess perceptions | CRHPE, Pakistan | Khan, M. I. H., 2018 (91) | Near -Peer Assisted Learning (NPAL) was perceived as rewarding in terms of promoting higher order thinking, improving teaching skills and in refining self-efficacy among tutors. NPAL showed improvement in transfer of learning. Near- peer tutors, tutees and faculty staff tutors had similar perception, as it increased depth of their knowledge and skills. | perception on near-peer assisted learning. | Level 1 |
| 92 | D5 | Effect of computer based animations on learning of physiology | CRHPE, Pakistan | Khan, M. A., Shukr, I., Sabir, S., & Qamar, K., 2017 (92) | Level of understanding of student increases if they are shown computer-based animations during the physiology lectures. Hence, animations have positive effect on student’s academic performance. | Randomized controlled study | Level 2 |
| 93 | D5 | Impact of an innovation approach of teaching science of dental materials on the learning experiences of under graduate students | CRHPE, Pakistan | Qazi, H. S., Ashar, A., & Ahmad, S. A., 2019 (93) | Clinical correlation of dental materials showed significant improvement in first year students due to an innovative approach by the help of the new rotational plan in clinics. | An interventional comparative study | Level 2 |
| 94 | D5 | Comparative effectiveness of teaching obstetrics and gynecology procedural skills on patients versus models: a randomized trial | CRHPE, Pakistan | Bhutta, S. Z., & Yasmin, H., 2018 (94) | simulations using models and mannequins for developing procedural skills can be readily incorporated in training programs with potential benefits for teaching infrequently performed or more difficult procedures. Data suggest potential benefits of initiation of trainings on simulations and mannequins followed by human subject exposure. | Randomized controlled trial | Level 2 |
| 95 | D5 | Peer-assisted motivation (PAM): a novel practical action research to combat absenteeism | CRHPE, Pakistan | Khan, M. I., & Naqi, S. A., 2018 (95) | Analysis concluded that students didn’t attend clinical lecture because they were busy in basic subjects and there was no examination for clinical subjects in 3rd year. In PAM, 4th year MBBS students motivated 3rd year students to attend clinical subject lectures. After intervention, attendance improved by 12.8%. The results were statistically significant (p ≤ 0.002). | Descriptive study | NA** |
| 96 | D5 | The University of Gezira Advisory System: Academic Advising of Excellent Students | EDC, Sudan | Mirghani, O. A., & Mohamed, M. E., 2015 (96) | Advising excellent students was of immense benefit to the students, the university, and community at large. | Descriptive study | NA** |

* D1- Curriculum Development and Course Design (CDCD), D2 - Student Assessment (SA), D3 - Quality, Accreditation, and Program Evaluation (QAPE), D4 -Teaching and Learning (TL), D5 -Innovation in ME (IME).

** NA – Not applicable / information not available

**Table S2: Medical Education articles (1998-2020) classified based on domains and Kirkpatrick’s model of evaluation**

| Domains | Level 1  (Reaction) | Level 2 (Learning) | Level 3 (Behavior) | Level 4  (Results) | Not applicable / information not available (NA) | Total |
| --- | --- | --- | --- | --- | --- | --- |
| D1- Curriculum Development and Course Design (CDCD) | 5  * (1,4,7,8,9) | 1  * (5) | 0 | 0 | 8  * (13,14, 2,3,  6,10,11,12) | 14 |
| D2- Student Assessment (SA) | 4  * (22,24,26,27) | 4  * (19,20,21,25) | 0 | 0 | 7  * (15,16,17,18,  23,28,29) | 15 |
| D3 - Quality, Accreditation, and Program Evaluation (QAPE) | 11  * (30,31,32,33,34,  35,36,37, 38,39,40) | 3  * (41,42,43) | 1  * (44) | 0 | 7  * (45,46,47,48,  49,50,51) | 22 |
| D4 - Teaching and Learning (TL) | 11  * (57, 52,60,61,62,  63,64,65, 66,67,68) | 8  *(58, 53,69,70,  71,72,73,74) | 0 | 0 | 6  * (75, 54,55,  56,59,76) | 25 |
| D5 - Innovation in Medical Education (IME) | 10  * (77,78,79,83,84,  85,86,89,90, 91) | 8  * (80,81,82,87,  88,92,93,94) | 0 | 0 | 2  * (95,96) | 20 |
| Total | 41 | 24 | 1 | 0 | 30 | 96 |

* the reference numbers mentioned in the table correspond to the ‘list of articles’ provided below

**Table S3: Medical Education articles (1998-2020) classified based on WHOCCs and Kirkpatrick’s model of evaluation**

| WHOCCs | Level 1  (Reaction) | Level 2  (Learning) | Level 3  (Behavior) | Level 4  (Results) | Not applicable /  information  not available (NA) | Total |
| --- | --- | --- | --- | --- | --- | --- |
| EDC, Sudan | 2  * (30,38) | 0 | 1  * (44) | 0 | 8  * (13,14,28,29,  47,48,49,96) | 11 |
| CRD, Egypt | 6  *(57,83,84,85,86,4) | 5  *(5,19,58,87,88) | 0 | 0 | 4  * (45,46,6,59) | 15 |
| CHPED, Bahrain | 5  * (1,52,77,78,79) | 4  * (53, 80,81,82) | 0 | 0 | 10  * (15,16,17,18,  50,2,3,54,55,56) | 19 |
| CRHPE, Pakistan | 28  *(31,32,33,34,35,36,37,89,90,91,7,8,9,22,24,26,27,39,40,60,61,62,63,64,65,66,67,68) | 15  * (20,21,25,41,42,  43,92,93,94,69,  70,71,72,73,74) | 0 | 0 | 8  * (23,51,75,95,  10,11,12,76) | 51 |
| Total | 41 | 24 | 1 | 0 | 30 | 96 |

* the reference numbers mentioned in the table correspond to the ‘list of articles’ provided below

**List of articles (1998-2020)**

1. Abu-Hijleh, M. F., Chakravarty, M., Al-Shboul, Q., Kassab, S., & Hamdy, H. (2005). Integrating applied anatomy in surgical clerkship in a problem-based learning curriculum. Surgical and Radiologic Anatomy, 27(2), 152-157.
2. Abu-Hijleh, M. F. (2010). The place of anatomy in medical education: Guide Supplement 41.1–Viewpoint. Medical teacher, 32(7), 601-603.
3. Bindayna, K. M., & Deifalla, A. (2020). “The Curriculum at the College of Medicine and Medical Sciences at Arabian Gulf University: A Way Forward to Meet the Future Medical Education Needs.” Journal of Medical Education and Curricular Development 7:1-5
4. Atwa, H. and Abdelaziz, A. (2017). “Evidence-based medicine (EBM) for undergraduate medical students: A six-step, integrative approach.” Medical Teacher 39:S27-S32
5. Eltony, S. A., et al. (2017). "Implementation and evaluation of a patient safety course in a problem-based learning program." Education for Health 30(1): 44.
6. Atwa, H., et al. (2016). "Teaching and Assessment of Professionalism: A Comparative Study between Two Medical Schools." Education in Medicine Journal 8(3).
7. Khan, A. A., Asher, A., Ahmad, A., Iqbal, S., & Khan, N. A. (2016). Frame Factors for Implementation of Integrated Curriculum in Public Sector Medical College-Faculty’s Perspective. Pakistan Armed Forces Medical Journal, 66(6), 891-97.
8. Asad, M., & Khaliq, T. (2020). Faculty pperception regarding iintegrated curriculum at undergraduate level: a qualitative study. Pakistan Armed Forces Medical Journal, 70(1), 217-23.
9. Waqar, T., & Khaliq, T. (2019). Integrated-modular system for under graduate medical students: faculty’s perception. Pakistan Armed Forces Medical Journal, 69(3), 465-71.
10. Rana, M. H., et al. (2008). " An outline of structured training programme (STP) for FCPS in Psychiatry (Intermediate Module)." Journal of Pakistan Psychiatric Society 5(2): 58-64.
11. Rana, M. H., Farooq, S., & Afridi, M. I. (2010). “An outline of structured training programme (STP) for FCPS in Psychiatry (3rd and 4th year of training).” Journal of Pakistan Psychiatric Society 7(1), 1-6.
12. Baig, L. A., Akram, D., & Ali, S. K. (2006). Development of the community-oriented medical education curriculum of Pakistan: A case report on the national initiative on curriculum development. EDUCATION FOR HEALTH-ABINGDON-CARFAX PUBLISHING LIMITED-, 19(2), 223.
13. Ahmed, Y. A. and S. Alneel (2017). "Analyzing the curriculum of the faculty of medicine, University of Gezira using Harden’s 10 questions framework." Journal of advances in medical education & professionalism 5(2): 60.
14. Abdelrahman SH, Alfadil SM. Introducing the IMCI community component into the curriculum of the Faculty of Medicine, University of Gezira. East Mediterr Health J. 2008 May-Jun;14(3):731-41. PMID: 18720638.
15. Kassab, S. E., et al. (2016a). "Generalisability theory analyses of concept mapping assessment scores in a problem‐based medical curriculum." Medical education 50(7): 730-737.
16. Fida, M. and S. E. Kassab (2015). "Do medical students’ scores using different assessment instruments predict their scores in clinical reasoning using a computer-based simulation?" Advances in medical education and practice 6: 135.
17. Kheyami, D., et al. (2018). "Item analysis of multiple choice questions at the Department of Paediatrics, Arabian Gulf University, Manama, Bahrain." Sultan Qaboos University Medical Journal 18(1): e68.
18. Amin, H., Shehata, M., Ahmed, S. (2020). “Step-by-step Guide to Create Competency-Based Assignments as an Alternative for Traditional Summative Assessment.” MedEdPublish, 9[1]:120
19. Abdelaziz, A., et al. (2016). "Development, implementation, and evaluation of an integrated multidisciplinary Objective Structured Clinical Examination (OSCE) in primary health care settings within limited resources." Medical teacher 38(3): 272-279.
20. Baqai, S. (2018). Mini-CEX a reliable and doable workplace-based assessment tool. Pakistan Armed Forces Medical Journal, 68(6), 1571-75.
21. Manzoor, I. (2014). Peer assisted versus expert assisted learning: a comparison of effectiveness in terms of academic scores. J Coll Physicians Surg Pak, 24(11), 825-9.
22. Waqar, S. H. (2016). Students’ perception of direct observation of procedural skills as workplace based assessment tool in general surgery. Pakistan Armed Forces Medical Journal, 66(5), 731-37.
23. Mahmood, H. (2015). Correlation of MCQ and SEQ scores in written undergraduate ophthalmology assessment. J Coll Physicians Surg Pak, 25(3), 185-88.
24. Bano, N., Arshad, F., Khan, S., & Safdar, C. A. (2015). Case based learning and traditional teaching strategies: Where lies the future?. Pakistan Armed Forces Medical Journal, 65(1), 118-124.
25. Sultana, S. (2018). Mini-CEX: feasibility, acceptability and effectiveness of its use in the learning of post graduate residents. Pakistan Armed Forces Medical Journal, 68(3), 601-07.
26. Sami, S., & Ahmad, A. (2015). Feedforward interview technique in obstetrics and gynaecology residents: A fact or fallacy. Journal of the College of Physicians and Surgeons Pakistan, 25(1), 35-40.
27. Khan MA, Iqbal U, Gondal KM, Qureshi AU, Khan UA. E-Log System in Monitoring of Residency Program: Trainees' Perspective. J Coll Physicians Surg Pak. 2015 Jul;25(7):501-4.
28. Magzoub, M. E. M., Schmidt, H. G., Abdel‐Hameed, A. A., Dolmans, D., & Mustafa, S. E. (1998). Student assessment in community settings: a comprehensive approach. Medical education, 32(1), 50-59.
29. Abdalla, M. E. (2013). Multiple Choice Questions Revisited: Improvement of Validity for Fair Tests. Gezira Journal of Health Sciences, 9(1).
30. Woolley, T., et al. (2019). "Does a socially-accountable curriculum transform health professional students into competent, work-ready graduates? A cross-sectional study of three medical schools across three countries." Medical teacher 41(12): 1427-1433.
31. Rehman, R., Usmani, A., Omaeer, Q., & Gul, H. (2014). Mentorship” a stride towards maintenance of medical student’s well being. J Pak Med Assoc, 64(12), 1352-1357.
32. Ansari T, Usmani A. Students perception towards feedback in clinical sciences in an outcome-based integrated curriculum. Pak J Med Sci. 2018;34(3):702-709. doi:10.12669/pjms.343.15021
33. Reza, Z., Jadoon, H. K., Danish, S. H., Fahad, S. K., & Ahmed, F. (2018). Student's opinion regarding teaching methods: A survey amongst MBBS and BDS students of a private Medical University in Karachi-Short Communication. JPMA. The Journal of the Pakistan Medical Association, 68(8), 1281-1284.
34. Ali, A. A. (2013). Communication skills training of undergraduates. J Coll Physicians Surg Pak, 23(1), 10-5.
35. Khalid, T. (2013). Faculty perceptions about roles and functions of a department of medical education. J Coll Physicians Surg Pak, 23(1), 56-61.
36. Moin, M., Sadia, S., & Naqi, S. A. (2016). Student perspective about One Minute Preceptorship in a busy outpatient setting. Pakistan Armed Forces Medical Journal, 66(1), 162-66.
37. Khan, M. N. A. (2018). The effects of teaching professionalism in a private medical college of Pakistan. Pakistan Armed Forces Medical Journal, 68(5), 1093-1100. Retrieved from https://www.pafmj.org/index.php/PAFMJ/article/view/2262
38. Ahmed, Y., et al. (2018). "Students’ perception of the learning environment and its relation to their study year and performance in Sudan." International journal of medical education 9: 145.
39. Usmani A, Rehman R, Babar S, Afzal A. Impact of Structured Meetings on the Learning of Faculty Members. J Postgrad Med Inst 2012; 26(3): 283-90.
40. Usmani, A., & Omaeer, Q. (2016). Students' views of mentoring at Bahria University Medical and Dental College. Pakistan journal of medical sciences, 32(6), 1489–1493. https://doi.org/10.12669/pjms.326.10625
41. Khalid, K., & Ahmad, S. A. (2019). Effectiveness of interactive lectures on knowledge retention and students motivation in undergraduate medical education-a mixed method study. Pakistan Armed Forces Medical Journal, 69(1), 206-11.
42. Hashmi, N. R. (2014). Team Based Learning (TBL) in undergraduate medical education. J Coll Physicians Surg Pak, 24(8), 553-556.
43. Nasir, J., Ashar, A., Ahmad, A., & Khanum, A. (2018). Impact of Case Based Discussion as an instructional tool on the annual examination results in ophthalmology for fourth year undergraduate medical students. Pakistan Armed Forces Medical Journal, 68(5), 1265-71. Retrieved from https://mail.pafmj.org/index.php/PAFMJ/article/view/2305
44. Ahmed, M. E. and S. H. Abdelrhan (2006). "The role of medical students in patient education to promote home management of diabetes mellitus in wad Medani town, Sudan 2003." Journal of family & community medicine 13(1): 41.
45. Hosny, S., et al. (2016). "Role of Suez Canal University, Faculty of Medicine in Egyptian Medical Education Reform." Health Professions Education 2(1): 44-50.
46. Hosny, S., et al. (2015). "Is our medical school socially accountable? The case of Faculty of Medicine, Suez Canal University." Medical teacher 37(sup1): S47-S55.
47. Elsanousi, S., Elsanousi, M., Khalafallah, O., & Habour, A. (2016). Assessment of the social accountability of the faculty of medicine at University of Gezira, Sudan.
48. Hussien, I. H., et al. (2011). "The Initiative of the University of Gezira for Safe Motherhood and Childhood-Gezira State Sudan 2005-2011." Gezira Journal of Health Sciences 7(2).
49. Larkins, S., et al. (2015). "Impact of selection strategies on representation of underserved populations and intention to practise: international findings." Medical education 49(1): 60-72.
50. Hamdy, H. and M. B. Anderson (2006). "The Arabian Gulf University College of Medicine and Medical Sciences: A successful model of a multinational medical school." Academic Medicine 81(12): 1085-1090.
51. Shaikh, S. H. (2009). A reform agenda outline for medical education in Pakistan. J Coll Physicians Surg Pak, 19(6), 331-332.
52. Tayem, Y. I., et al. (2015). "Medical students’ perceptions of peer assessment in a problem-based learning curriculum." Sultan Qaboos University Medical Journal 15(3): e376.
53. Hassan, A. B., et al. (2018). "Impact of clinical simulation on the clinical competence of medical students clerkship training, Bahrain Med." Bull 40(4): 230-233.
54. Kassab, S. E., et al. (2016b). "Lecturing skills as predictors of tutoring skills in a problem-based medical curriculum." Advances in medical education and practice 7: 1.
55. Hasan, Z. and R. Sequeira (2012). "Challenges of teaching physiology in an integrated system-based curriculum." Canadian medical education journal 3(1): e73.
56. Kassab, S. E., et al. (2017). "Development and validation of the motivation for tutoring questionnaire in problem-based learning programs." Health Professions Education 3(1): 50-58.
57. Farghaly, A. and A. Abdelaziz (2017). "Coaching as a Tool for Personal and Professional Development in a Problem-Based Learning (PBL) Medical Curriculum: A Qualitative Study." Education in Medicine Journal 9(3).
58. Radwan, A., et al. (2018). "Correlation between Assessment of Concept Maps Construction and the Clinical Reasoning Ability of Final Year Medical Students at the Faculty of Medicine, Suez Canal University, Egypt." Education in Medicine Journal 10(4).
59. Atwa, H. S. (2018). Assessment of Medical Students’ Readiness for Self-directed Learning. Egyptian Journal of Community Medicine, 36(1).
60. Ijaz, A. (2014). "Evaluation of strategies to increase students involvement for improving interactive lectures in chemical pathology." Pakistan Armed Forces Medical Journal 64(2): 237-243.
61. Zubair, S., Khan, M. A., & Ayub, T. (2019). Changes in the level and factors affecting students ‘motivation in the first 6 months of dental education at dental colleges. Pakistan Armed Forces Medical Journal, 69(2), 279-85.
62. Abbasi, S., Mubeen, N., Ayub, T., Khan, M., Abbasi, Z., & Baig, N. (2020). Comparison of stress levels among medical and dental students in the clinical years of training and their coping strategies. J. Pak. Med. Assoc, 70(1).
63. Usmani, A., Sultan, S. T., Ali, S., Fatima, N., & Babar, S. (2011). Comparison of students and facilitators' perception of implementing problem based learning. JPMA-Journal of the Pakistan Medical Association, 61(4), 332.
64. Ahmad, F., Zehra, N., Omair, A., & Anjum, Q. (2009). Students' opinion regarding application of Epidemiology, Biostatistics and Survey Methodology Courses in medical research. JPMA. The Journal of the Pakistan Medical Association, 59(5), 307.
65. Ahmed, Z. (2014). Problems of group dynamics in problem based learning sessions. Journal of Ayub Medical College Abbottabad, 26(2), 230-234.
66. Khan, B. (2014). Undergraduate students’perception about current lecturing practices. Pakistan Armed Forces Medical Journal, 64(2), 319-27.
67. Aziz, A., Iqbal, S., & Zaman, A. U. (2014). Problem based learning and its implementation: faculty and student’s perception. Journal of Ayub Medical College Abbottabad, 26(4), 496-500.
68. Imran, M. (2019). Analysis of learning and teaching strategies in Surgery Module: A mixed methods study. JPMA, 69(1286).
69. Qamar, M. R., Ahmad, A., & Niaz, K. (2015). Learning through small group discussion versus didactic lectures. Pakistan Armed Forces Medical Journal, 65(3), 386-390.
70. Ali, Q. M., Raza, S. H., & Masroor, S. (2018). Fostering deep learning approach with small group discussion (SGD). Pakistan Armed Forces Medical Journal, 68(4), 788-91.
71. Aisha, D. (2020). Perception Of “Stress” And “Stressors”Among First Year Medical Students And Effect Of Intervention On Their Stress Perception. PAFMJ, 70(3), 801-06. Retrieved from https://www.pafmj.org/index.php/PAFMJ/article/view/4664
72. Jabeen, D. (2013). Use of simulated patients for assessment of communication skills in undergraduate medical education in obstetrics and gynaecology. J Coll Physicians Surg Pak, 23(1), 16-9.
73. Tayyeb, R. (2013). Effectiveness of problem based learning as an instructional tool for acquisition of content knowledge and promotion of critical thinking among medical students. J Coll Physicians Surg Pak, 23(1), 42-6.
74. Suliman, M. I., Imran, F., Shafiq, A., & Qayum, I. (2016). Complementing theory with practice to enhance students’ learning. Journal of Ayub Medical College Abbottabad, 28(2), 315-322.
75. Mughal, A. M., & Shaikh, S. H. (2018). Assessment of collaborative problem solving skills in Undergraduate Medical Students at Ziauddin College of Medicine, Karachi. Pakistan journal of medical sciences, 34(1), 185.
76. Bhalli, M. A., Khan, I. A., & Sattar, A. (2016). Learning style of medical students and its correlation with preferred teaching methodologies and academic achievement. Journal of Ayub Medical College Abbottabad, 27(4), 837-842.
77. James, H., et al. (2015). "Effective use of real-life events as tools for teaching-learning clinical pharmacology in a problem-based learning curriculum." Indian journal of pharmacology 47(3): 316.
78. Tim, Y., et al. (2017). "Medical students perceptions of supporting pharmacology learning in English by key information prepared in Arabic." Eastern Mediterranean Health Journal 23(5): 361.
79. Gaber, D. A., Shehata, M. H., Amin, H. A. (2020). “Online Team‐Based Learning Sessions as Interactive Methodologies During the Pandemic.” Medical Education 54(7): 666-667.
80. Nouby, A. M. and A. H. Salem (2016). "Design of e-Learning Using Problem-Based Learning Strategy: its Effectiveness on Medical Students’ Achievement and Attitude towards the Learning Method." Journal of Educational & Psychological Sciences 17(01).
81. Tayem, Y. I., et al. (2016). "Competence of medical students in communicating drug therapy: Value of role-play demonstrations." Indian journal of pharmacology 48(1): 37.
82. Kassab, S., et al. (2005). "Student-led tutorials in problem-based learning: educational outcomes and students' perceptions." Medical teacher 27(6): 521-526.
83. Talaat, W. and H. Salem (2009). "A new opportunity for Egyptian health professions educators." Medical education 43(5): 498.
84. Hosny, S. and M. S. Ghaly (2014). "Teaching evidence-based medicine using a problem-oriented approach." Medical teacher 36(sup1): S62-S68.
85. El‐Wazir, Y., Hosny, S., & Farouk, O. (2011). Revitalising student motivation in problem‐based learning with computer enhancement. Medical education, 5(45), 511-511.
86. Hosny, S., et al. (2013). "Integrating interprofessional education in community-based learning activities: case study." Medical teacher 35(sup1): S68-S73.
87. Hosny, S., et al. (2008). "Introducing computer-assisted training sessions in the clinical skills lab at the Faculty of Medicine, Suez Canal University." Medical teacher 30(2): e35-e40.
88. El Bakry, A. A. N., Farghaly, A., Hany, M., Shehata, A. M., & Hosny, S. (2018). Evaluation of an Interprofessional Course on Leadership and Management for Medical and Nursing Pre-registration House Officers. Education in Medicine Journal, 10(1), 41-52.
89. Naqi, S. A. (2014). Peer assisted learning as a formal instructional tool. J Coll Physicians Surg Pak, 24(3), 169-72.
90. Khan, A., Usmani, A., & Khaliq, T. (2020). WhatsApp an informal learning and communication tool: Perception of medical officers working in low resource setting: A Focus Group Discussion. JPMA. The Journal of the Pakistan Medical Association, 70(2), 225-230.
91. Khan, M. I. H. (2018). Do near-peers learn better by teaching junior colleagues? A qualitative study to assess perceptions. Journal of Fatima Jinnah Medical University, 12(3).
92. Khan, M. A., Shukr, I., Sabir, S., & Qamar, K. (2017). Effect of computer based animations on learning of physiology. Pakistan Armed Forces Medical Journal, 67(2), 271-75.
93. Qazi, H. S., Ashar, A., & Ahmad, S. A. (2019). Impact of an innovative approach of teaching science of dental materials on the learning experiences of undergraduate students. Pakistan Armed Forces Medical Journal, 69(3), 582-88.
94. Bhutta, S. Z., & Yasmin, H. (2018). Comparative Effectiveness of Teaching Obstetrics and Gynaecological Procedural Skills on Patients versus Models: A randomized trial. Pakistan journal of medical sciences, 34(4), 794.
95. Khan, M. I., & Naqi, S. A. (2018). Peer-assisted motivation: a novel practical action research to combat absenteeism. Journal of Fatima Jinnah Medical University, 12(3).
96. Mirghani, O. A., & Mohamed, M. E. (2015). The University of Gezira Advisory System: Academic Advising of Excellent Students. Gezira Journal of Health Sciences, 11(1).
